# Supplementary material for: Generalizable biomarker prediction from cancer pathology slides with self-supervised deep learning: A retrospective multi-centric study
Source: PubMed Central journal article supplement (PMC10140458; doi:10.1016/j.xcrm.2023.100980), 2023-03-22
Supplement: mmc1.pdf [file mmc1.pdf]

**Cell Reports Medicine, Volume 4**

**Supplemental information**

**Generalizable biomarker prediction from cancer  
pathology slides with self-supervised deep  
learning: A retrospective multi-centric study**

**Jan Moritz Niehues, Philip Quirke, Nicholas P. West, Heike I. Grabsch, Marko van Treeck, Yoni Schirris, Gregory P. Veldhuizen, Gordon G.A. Hutchins, Susan D. Richman, Sebastian Foersch, Titus J. Brinker, Junya Fukuoka, Andrey Bychkov, Wataru Uegami, Daniel Truhn, Hermann Brenner, Alexander Brobeil, Michael Hoffmeister, and Jakob Nikolas Kather**

## Supplementary Tables

| QUASAR                     | TP   | FN   | TN   | FP   | DACHS                      | TP   | FN   | TN   | FP   |
|----------------------------|------|------|------|------|----------------------------|------|------|------|------|
| Male                       | 110  | 17   | 808  | 140  | Male                       | 80   | 37   | 1042 | 40   |
| Female                     | 107  | 11   | 490  | 86   | Female                     | 61   | 32   | 718  | 29   |
| Colon                      | 199  | 25   | 875  | 178  | Colon                      | 138  | 59   | 1029 | 48   |
| Rectum                     | 7    | 2    | 391  | 37   | Rectum                     | 3    | 10   | 731  | 21   |
| Left                       | 177  | 19   | 861  | 105  | Left                       | 126  | 48   | 1230 | 37   |
| Right                      | 24   | 8    | 341  | 101  | Right                      | 14   | 21   | 511  | 32   |
| Age                        | 61.4 | 60.6 | 62.6 | 62.2 | Age                        | 70.8 | 69.0 | 68.7 | 66.9 |
| Tumor Stage                | 2.1  | 2.1  | 2.1  | 2.1  | Tumor Stage                | 2.2  | 2.1  | 2.5  | 2.8  |
| <i>BRAF</i> <sup>wt</sup>  | 92   | 18   | 895  | 140  | <i>BRAF</i> <sup>wt</sup>  | 70   | 53   | 1555 | 51   |
| <i>BRAF</i> <sup>mut</sup> | 59   | 4    | 30   | 11   | <i>BRAF</i> <sup>mut</sup> | 62   | 15   | 53   | 11   |
| <i>KRAS</i> <sup>wt</sup>  | 117  | 12   | 533  | 88   | <i>KRAS</i> <sup>wt</sup>  | 110  | 47   | 1073 | 51   |
| <i>KRAS</i> <sup>mut</sup> | 28   | 8    | 373  | 56   | <i>KRAS</i> <sup>mut</sup> | 23   | 18   | 553  | 16   |
|                            |      |      |      |      | CIMP                       | 95   | 39   | 1560 | 59   |
|                            |      |      |      |      | non-CIMP                   | 46   | 30   | 200  | 10   |

**Table S1: Clinical statistics stratified by MSI biomarker test outcome for patients with CRC in the QUASAR (left) and DACHS (right) cohort at threshold value 0.5, Related to Figure 3.** TP = True positive, FN = False negative, TN = True negative, FP = False positives.

| QUASAR                    | TP   | FN   | TN   | FP   | DACHS                     | TP   | FN   | TN   | FP   |
|---------------------------|------|------|------|------|---------------------------|------|------|------|------|
| Male                      | 47   | 18   | 641  | 204  | Male                      | 81   | 14   | 835  | 318  |
| Female                    | 41   | 14   | 357  | 154  | Female                    | 48   | 8    | 486  | 285  |
| Colon                     | 79   | 25   | 642  | 282  | Colon                     | 120  | 17   | 742  | 424  |
| Rectum                    | 5    | 5    | 309  | 56   | Rectum                    | 9    | 5    | 579  | 179  |
| Left                      | 74   | 20   | 650  | 186  | Left                      | 110  | 15   | 977  | 322  |
| Right                     | 8    | 10   | 245  | 145  | Right                     | 18   | 7    | 330  | 277  |
| Age                       | 66.0 | 63.6 | 62.6 | 61.0 | Age                       | 73.1 | 73.7 | 68.5 | 68.0 |
| Tumor Stage               | 2.13 | 2.13 | 2.1  | 2.1  | Tumor Stage               | 2.6  | 1.9  | 2.3  | 2.7  |
| MSI                       | 55   | 20   | 816  | 219  | MSI                       | 66   | 11   | 1135 | 471  |
| non-MSI                   | 21   | 8    | 38   | 72   | nonMSI                    | 55   | 9    | 50   | 73   |
| <i>KRAS</i> <sup>wt</sup> | 83   | 28   | 593  | 176  | <i>KRAS</i> <sup>wt</sup> | 114  | 21   | 803  | 357  |

|                            |   |   |     |     |                            |    |    |      |     |
|----------------------------|---|---|-----|-----|----------------------------|----|----|------|-----|
| <i>KRAS</i> <sup>mut</sup> | 2 | 3 | 381 | 167 | <i>KRAS</i> <sup>mut</sup> | 8  | 21 | 426  | 198 |
|                            |   |   |     |     | CIMP                       | 82 | 16 | 1173 | 491 |
|                            |   |   |     |     | non-CIMP                   | 45 | 6  | 139  | 104 |

**Table S2: Clinical statistics stratified by *BRAF* biomarker test outcome for patients with CRC in the QUASAR (left) and DACHS (right) cohort at threshold value 0.5, Related to Figure 3. TP = True positive, FN = False negative, TN = True negative, FP = False positives.**

|                    | INPT   | Wang+attMIL | Ciga+attMIL | multi-input | clinical data only |
|--------------------|--------|-------------|-------------|-------------|--------------------|
| INPT               | 1      | 0.0284      | 0.9526      | 0.0218      | 0.0003             |
| Wang+attMIL        | 0.0284 | 1           | 0.0132      | 0.7316      | <0.0001            |
| Ciga+attMIL        | 0.9526 | 0.0132      | 1           | 0.0103      | 0.0001             |
| multi-input        | 0.0218 | 0.7316      | 0.0103      | 1           | <0.0001            |
| clinical data only | 0.0003 | <0.0001     | 0.0001      | <0.0001     | 1                  |

**Table S3: p-values from ANOVA analysis comparing all possible AUROC pairs of MSI models internal validation performances on Macenko normalized tiles in QUASAR, Related to STAR Methods.**

|                    | INPT   | Wang+attMIL | Ciga+attMIL | multi-input | clinical data only |
|--------------------|--------|-------------|-------------|-------------|--------------------|
| INPT               | 1      | 0.0069      | 0.9005      | 0.0221      | 0.4404             |
| Wang+attMIL        | 0.0069 | 1           | 0.0346      | 0.8161      | 0.1679             |
| Ciga+attMIL        | 0.9005 | 0.0346      | 1           | 0.0484      | 0.4796             |
| multi-input        | 0.0221 | 0.8161      | 0.0484      | 1           | 0.1747             |
| clinical data only | 0.4404 | 0.1679      | 0.4796      | 0.1747      | 1                  |

**Table S4: p-values from ANOVA analysis comparing all possible AUROC pairs of *BRAF* models internal validation performances on Macenko normalized tiles in QUASAR, Related to STAR Methods.**

|             | INPT    | Wang+attMIL | Ciga+attMIL | multi-input | clinical data only |
|-------------|---------|-------------|-------------|-------------|--------------------|
| INPT        | 1       | 0.0002      | <0.0001     | 0.0002      | 0.0001             |
| Wang+attMIL | 0.0002  | 1           | <0.0001     | 0.7009      | <0.0001            |
| Ciga+attMIL | <0.0001 | <0.0001     | 1           | <0.0001     | 0.0001             |
| multi-input | 0.0002  | 0.7009      | <0.0001     | 1           | <0.0001            |

|                    |        |         |        |         |   |
|--------------------|--------|---------|--------|---------|---|
| clinical data only | 0.0001 | <0.0001 | 0.0001 | <0.0001 | 1 |
|--------------------|--------|---------|--------|---------|---|

**Table S5: p-values from ANOVA analysis comparing all possible AUROC pairs of MSI models validation performances on Macenko normalized tiles in DACHS, Related to STAR Methods.**

|                    | INPT    | Wang+attMIL | Ciga+attMIL | multi-input | clinical data only |
|--------------------|---------|-------------|-------------|-------------|--------------------|
| INPT               | 1       | 0.0001      | 0.0039      | <0.0001     | 0.8309             |
| Wang+attMIL        | 0.0001  | 1           | <0.0001     | 0.0316      | <0.0001            |
| Ciga+attMIL        | 0.0039  | <0.0001     | 1           | <0.0001     | 0.0014             |
| multi-input        | <0.0001 | 0.0316      | <0.0001     | 1           | <0.0001            |
| clinical data only | 0.8309  | <0.0001     | 0.0014      | <0.0001     | 1                  |

**Table S6: p-values from ANOVA analysis comparing all possible AUROC pairs of MSI models validation performances on non-normalized tiles in DACHS, Related to STAR Methods.**

|                    | INPT    | Wang+attMIL | Ciga+attMIL | multi-input | clinical data only |
|--------------------|---------|-------------|-------------|-------------|--------------------|
| INPT               | 1       | 0.0019      | 0.0021      | <0.0001     | 0.8074             |
| Wang+attMIL        | 0.0019  | 1           | <0.0001     | 0.0003      | 0.031              |
| Ciga+attMIL        | 0.0021  | <0.0001     | 1           | <0.0001     | 0.0064             |
| multi-input        | <0.0001 | 0.0003      | <0.0001     | 1           | 0.0006             |
| clinical data only | 0.8074  | 0.031       | 0.0064      | 0.0006      | 1                  |

**Table S7: p-values from ANOVA analysis comparing all possible AUROC pairs of *BRAF* models validation performances on Macenko normalized tiles in DACHS, Related to STAR Methods.**

|                    | INPT    | Wang+attMIL | Ciga+attMIL | multi-input | clinical data only |
|--------------------|---------|-------------|-------------|-------------|--------------------|
| INPT               | 1       | 0.0795      | 0.0177      | <0.0001     | 0.0804             |
| Wang+attMIL        | 0.0795  | 1           | 0.0038      | 0.0047      | 0.977              |
| Ciga+attMIL        | 0.0177  | 0.0038      | 1           | 0.0002      | 0.0038             |
| multi-input        | <0.0001 | 0.0047      | 0.0002      | 1           | 0.0041             |
| clinical data only | 0.0804  | 0.977       | 0.0038      | 0.0041      | 1                  |

**Table S8: p-values from ANOVA analysis comparing all possible AUROC pairs of *BRAF* models validation performances on non-normalized tiles in DACHS, Related to STAR Methods.**

# Supplementary Figures

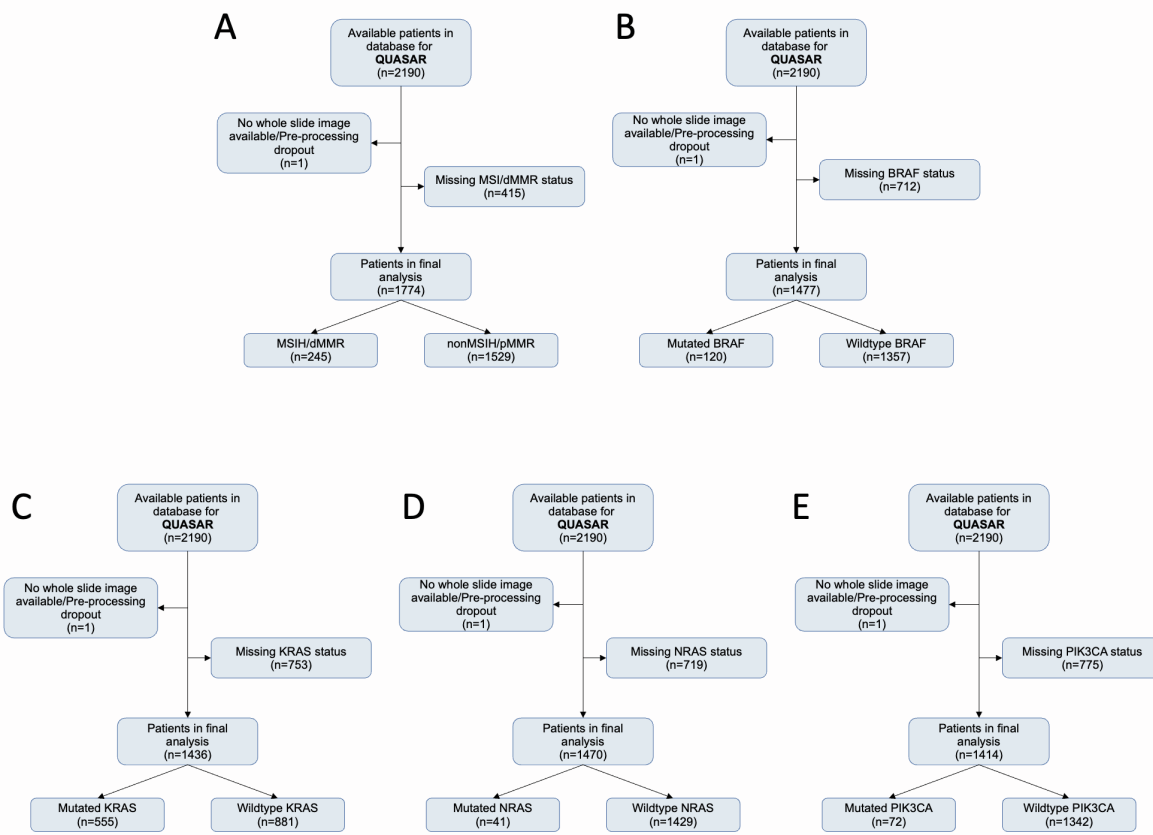

**Figure S1: CONSORT charts for QUASAR, Related to Table 2 and STAR Methods. (A) MSI status, (B) BRAF status, (D) KRAS status, (D) NRAS status, (E) PIK3CA status.**

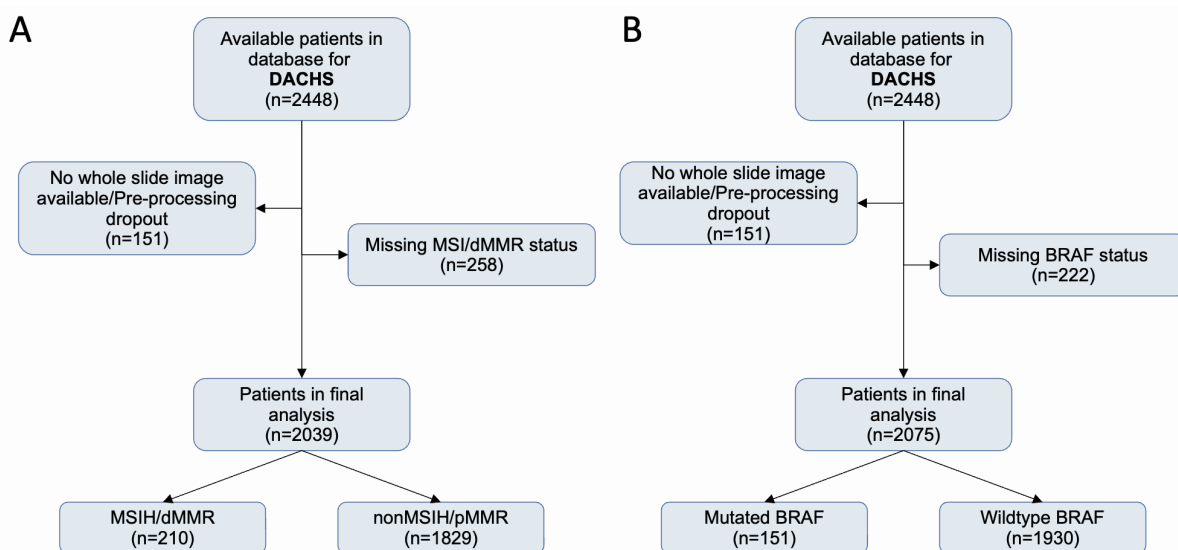

**Figure S2: CONSORT charts for DACHS, Related to Table 2 and STAR methods. (A) MSI status, (B) BRAF status.**

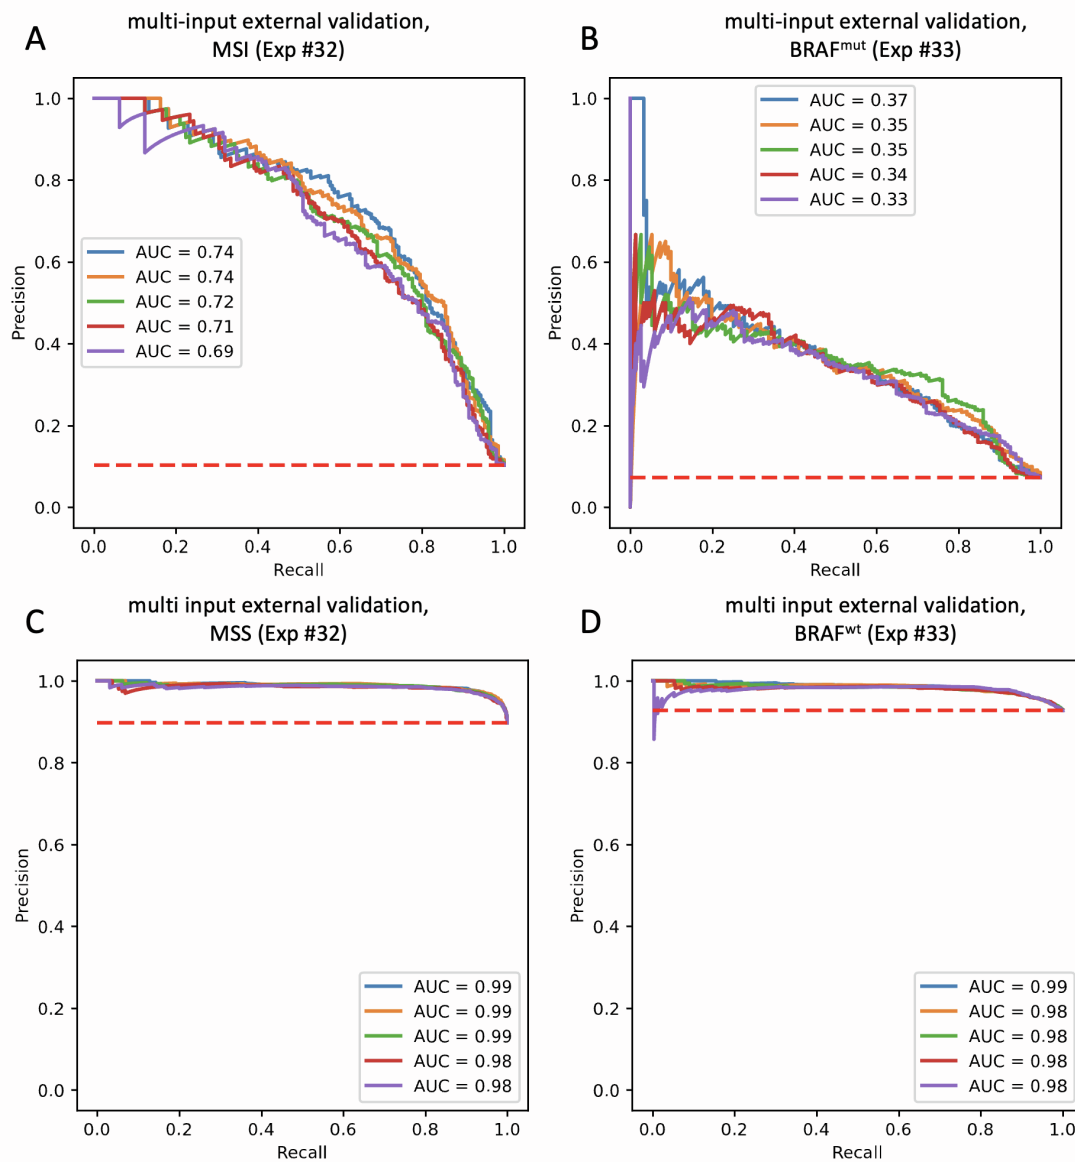

**Figure S3: Precision recall curves (PRC) for the external validation (on QUASAR) of the best model (Wang-attMIL), Related to Table 1. (A)** PRC for MSI detection, MSI class. **(B)** PRC for *BRAF* mutation prediction, *BRAF* mutant class, **(C)** PRC for MSI detection, non-MSI (MSS) class, **(D)** PRC for *BRAF* mutation prediction, *BRAF* wild type class. The y-values of the horizontal dotted red lines in A-D denote the fraction of true positives in the data sets and represent the precisions achieved if every patient was classified as positive.

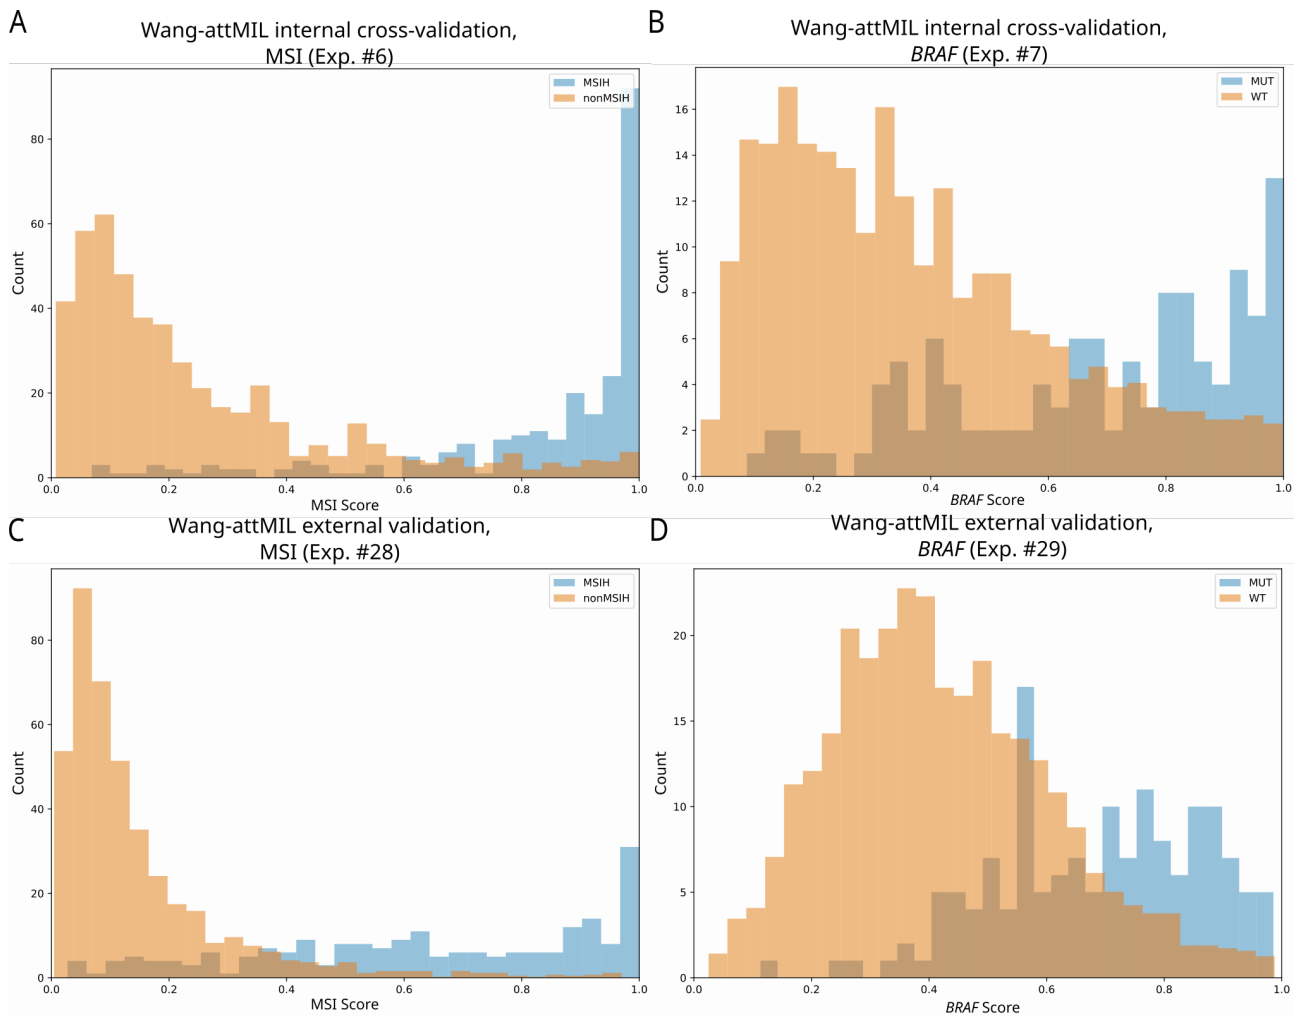

**Figure S4: Quantification of the domain shift between internal and external prediction performance for the best image-only models (Wang-attMIL), Related to Table 1. (A)** Distribution of model prediction scores for all patients in QUASAR, split by MSI status (ground truth), obtained via cross-validation; scores MSIH: median( $m$ )=0.92, lower quartile( $q1$ )=0.78, upper quartile( $q3$ )=0.98; scores nonMSIH:  $m$ =0.169,  $q1$ =0.085,  $q3$ =0.34. **(B)** Distribution of model prediction scores for all patients in QUASAR, split by *BRAF* status (ground truth), obtained via cross-validation; scores MUT:  $m$ =0.74,  $q1$ =0.48,  $q3$  =0.89; scores WT: median=0.32,  $q1$ =0.18,  $q3$ =0.51. **(C)** Average MSI score distribution of predictions across all models for patients in DACHS, split by MSI status (ground truth); scores MSIH:  $m$ =0.64,  $q1$ = 0.43,  $q3$ =0.90; scores nonMSIH:  $m$ =0.097,  $q1$ =0.055,  $q3$ =0.18. **(D)** Average *BRAF* score distribution of predictions across all models for patients in DACHS, split by *BRAF* status (ground truth); scores MUT:  $m$ =0.79,  $q1$ =0.66,  $q3$ =0.88; WT:  $m$ =0.37,  $q1$ =0.28,  $q3$ =0.54. Displayed frequency distributions of the more frequent class (i.e. the negative class) are rescaled to twice the frequency of the less frequent class. For internal validation, summed distributions over all five test sets, and for external validation, averaged distributions over all five models are shown.

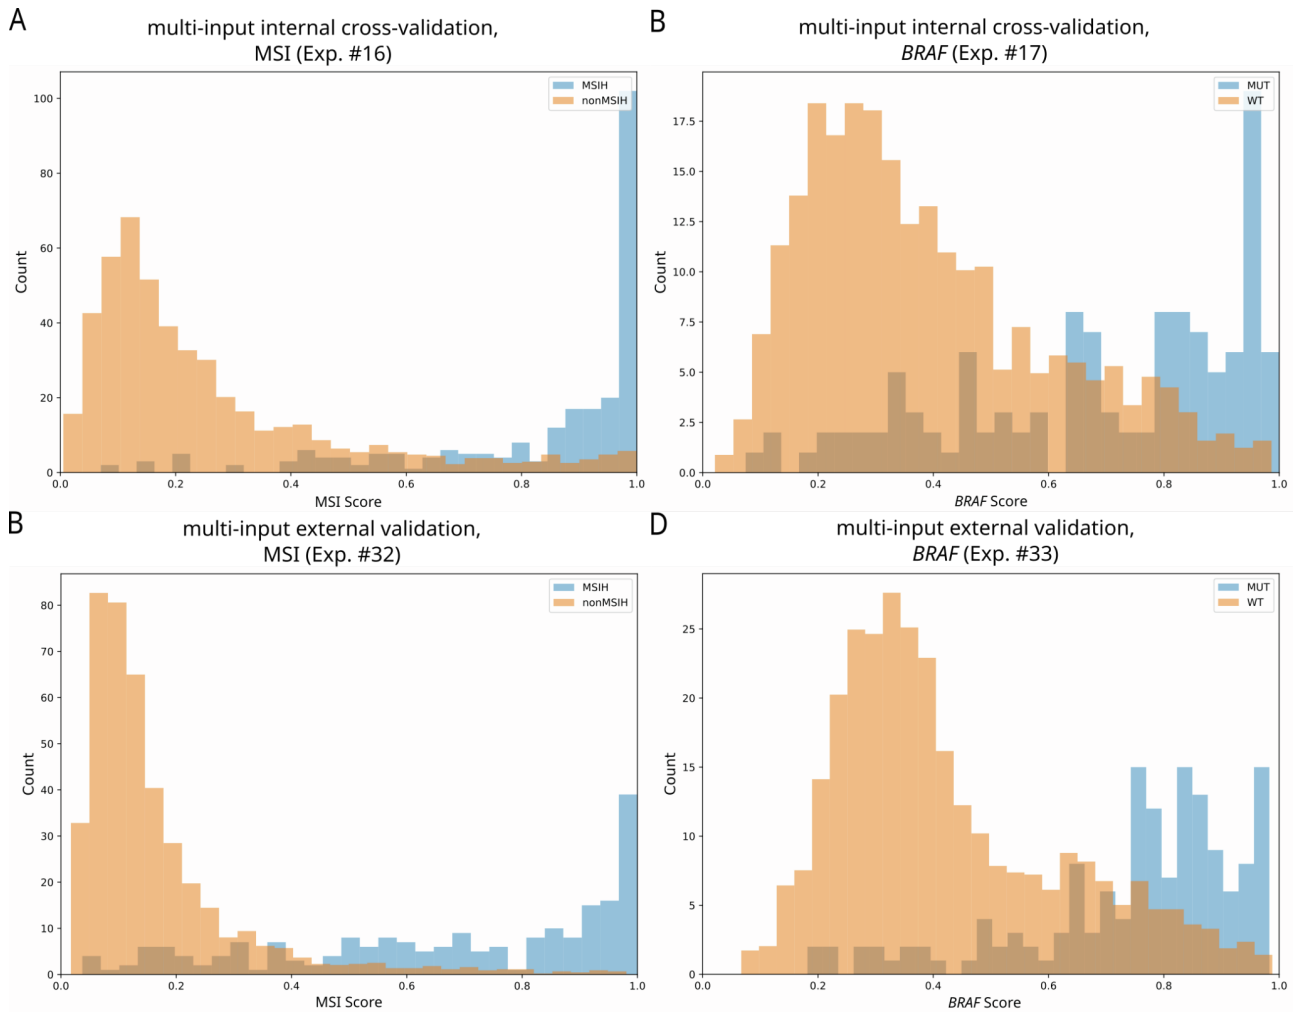

**Figure S5: Prediction score distribution in internal and external sets for the best model (multi-input model), Related to Taable 1. (A)** Distribution of model prediction scores for all patients in QUASAR, split by MSI status (ground truth), obtained via cross-validation; scores MSIH: median( $m$ )=0.94, lower quartile( $q1$ )=0.74, upper quartile( $q3$ )=0.99; scores nonMSIH:  $m$ =0.18,  $q1$ =0.11,  $q3$ =0.32. **(B)** Distribution of model prediction scores for all patients in QUASAR, split by BRAF status (ground truth), obtained via cross-validation; scores MUT:  $m$ =0.78,  $q1$ =0.49,  $q3$ =0.91; scores WT:  $m$ =0.34,  $q1$ =0.23,  $q3$ =0.51. **(C)** Distribution of model prediction scores for all patients in DACHS, split by MSI status (ground truth), obtained via cross-validation; scores MSIH:  $m$ =0.72,  $q1$ =0.48,  $q3$ =0.94; scores nonMSIH:  $m$ =0.12,  $q1$ =0.08,  $q3$ =0.19. **(D)** Distribution of model prediction scores for all patients in DACHS, split by BRAF status (ground truth), obtained via cross-validation; scores MUT:  $m$ =0.79,  $q1$ =0.66,  $q3$ =0.88; scores WT:  $m$ =0.37,  $q1$ =0.28,  $q3$ =0.54.



Wang-attMIL external validation,  
MSI (Exp #28) and BRAF (Exp #29)

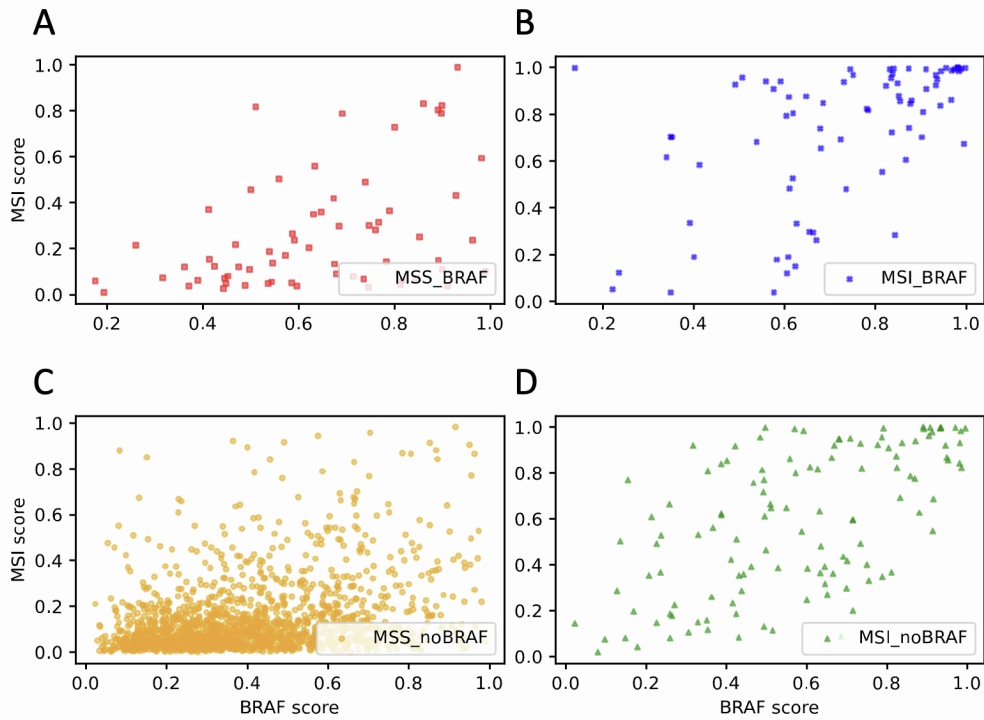

**Figure S6: Correlation of prediction scores for MSI and BRAF status for the best image-only model (attMIL with Wang features), Related to Figure 5. (A)** Correlation of MSI (vertical axis) and BRAF (horizontal axis) prediction score for patients with ground truth status: MSS, BRAF mut. **(B)** Correlation of MSI (vertical axis) and BRAF (horizontal axis) prediction score for patients with ground truth status: MSI, BRAF mut. **(C)** Correlation of MSI (vertical axis) and BRAF (horizontal axis) prediction score for patients with ground truth status: MSS, BRAF wild type. **(D)** Correlation of MSI (vertical axis) and BRAF (horizontal axis) prediction score for patients with ground truth status: MSI, BRAF wild type.
